# Supplementary material for: Coupling a large-scale hydrological model (CWatM) with a high-resolution groundwater flow model to assess the impact of irrigation at regional scale
Source: Copernicus journal article supplement (doi:10.5194/gmd-2022-161), 2022-06-23
Supplement: Supplementary file 1 [file gmd-2022-161-supplement.pdf]

## Supplement Material:

### Coupling a large-scale hydrological model (CWatM) with a high-resolution groundwater flow model to assess the impact of irrigation at regional scale

Luca Guillaumot<sup>1</sup>, Mikhail Smilovic<sup>1</sup>, Peter Burek<sup>1</sup>, Jens de Bruijn<sup>1,2</sup>, Peter Greve<sup>1</sup>, Taher Kahil<sup>1</sup>,  
5 Yoshihide Wada<sup>1</sup>

<sup>1</sup> Water Security Research Group, Biodiversity and Natural Resources Program, International Institute for Applied Systems Analysis (IIASA), Laxenburg, Austria

<sup>2</sup> Institute for Environmental Studies, VU University, De Boelelaan 1087, 1081HV, Amsterdam, The Netherlands

#### 10 Impact of irrigation settings

We tested the sensitivity of CWatM-MODFLOW in Seewinkel and Bhima to two irrigation settings: the irrigation efficiency factor and the spatial density of pumping wells. Irrigation efficiency would mainly impact groundwater pumping rates to compensate for irrigation losses. The spatial density of pumping well would concentrate more or less imposed pumping rates within pumping wells. Both settings would potentially impact the water table and the comparison of the water table observed  
15 in the monitoring well network. This would result in different evapotranspiration rates in irrigated lands (due to irrigation loss) and in groundwater-supported areas due to the modification of the water table.

In Seewinkel, irrigation efficiency was set to 0.7 in CWatM-MODFLOW and the spatial density of pumping wells was one pumping well per 1 km<sup>2</sup>. We tested three additional settings, listed below:

- Scenario 1: irrigation efficiency = 0.6, one pumping well per 1 km<sup>2</sup>
- 20 - Scenario 2: irrigation efficiency = 0.8, one pumping well per 1 km<sup>2</sup>
- Scenario 3: irrigation efficiency = 0.7, one pumping well per 0.04 km<sup>2</sup>

The results are presented in the following table and figure:

25 **Table S1: Impact of several scenarios in Seewinkel on groundwater (GW) pumping, evapotranspiration, and mean water table depth in monitoring wells.**

|                         | <b>GW pumping [mm/yr]</b> | <b>Evapotranspiration rate from irrigated land [mm/yr/m<sup>2</sup>]</b> | <b>Evapotranspiration rate from groundwater-supported areas [mm/yr/m<sup>2</sup>]</b> | <b>Mean water table depth in boreholes [m]</b> |
|-------------------------|---------------------------|--------------------------------------------------------------------------|---------------------------------------------------------------------------------------|------------------------------------------------|
| <b>Standard version</b> | 31                        | 544                                                                      | 573                                                                                   | 2                                              |

|                   |    |     |     |     |
|-------------------|----|-----|-----|-----|
| <b>Scenario 1</b> | 34 | 560 | 572 | 2,1 |
| <b>Scenario 2</b> | 28 | 533 | 574 | 2   |
| <b>Scenario 3</b> | 33 | 547 | 573 | 2   |

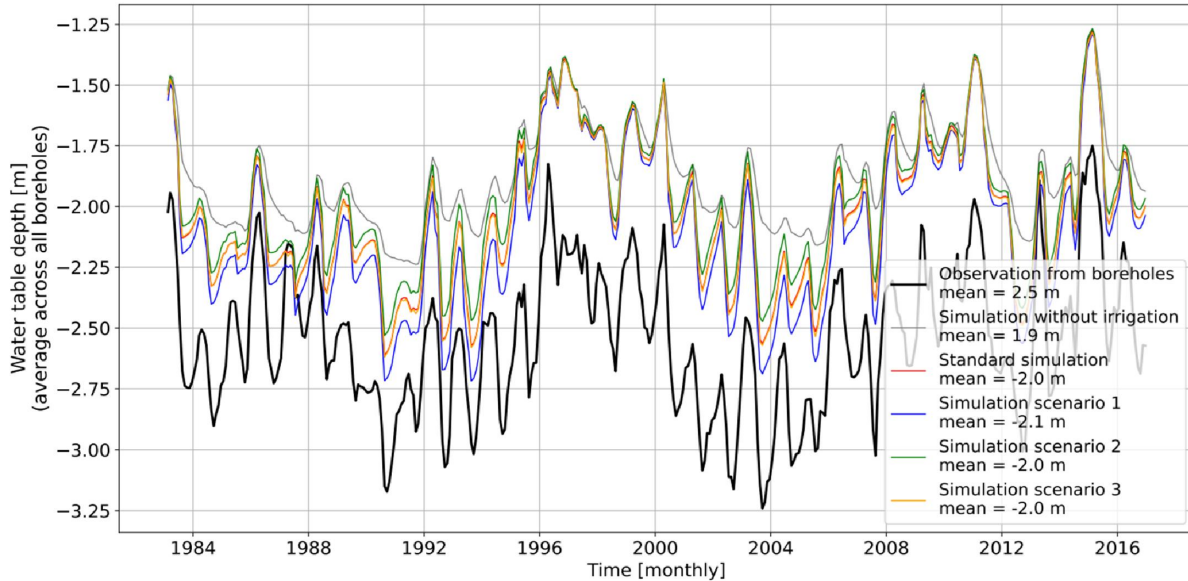

**Figure S1: Comparison between observed and simulated water table depth with different scenarios in Seewinkel. Black lines represent observed data. Water table depth fluctuations are aggregated from 62 boreholes.**

30 Mean water table fluctuation anomalies are not impacted by the three scenarios, where scenario 1 shows the largest difference ( $nRMSE = 56\%$  compared to  $52\%$  with the standard version). Mean water table depth is not significantly impacted due to the evapotranspiration rate in groundwater-supported areas (Table S1).

In Bhima, irrigation efficiency was set to 0.7 (0.6 for paddy fields) in CWatM-MODFLOW and the spatial density of pumping wells was one pumping well per  $0.0625 \text{ km}^2$ . We tested three additional different settings, as listed below:

- 35 - Scenario 1: irrigation efficiency = 0.6, one pumping well per  $0.0625 \text{ km}^2$   
 - Scenario 2: irrigation efficiency = 0.8, one pumping well per  $0.0625 \text{ km}^2$   
 - Scenario 3: irrigation efficiency = 0.7, one pumping well per  $0.025 \text{ km}^2$

The results are presented in the following table and figure:

40 **Table S2: Impact of several scenarios in Bhima on groundwater (GW) pumping, evapotranspiration, and mean water table depth in monitoring wells.**

|  | <b>GW pumping [mm/yr]</b> | <b>Evapotranspiration rate from irrigated land [mm/yr/m<sup>2</sup>]</b> | <b>Evapotranspiration rate from groundwater-supported areas</b> | <b>Mean water table depth in boreholes [m]</b> |
|--|---------------------------|--------------------------------------------------------------------------|-----------------------------------------------------------------|------------------------------------------------|
|--|---------------------------|--------------------------------------------------------------------------|-----------------------------------------------------------------|------------------------------------------------|

|                         |     |     | [mm/yr/m <sup>2</sup> ] |     |
|-------------------------|-----|-----|-------------------------|-----|
| <b>Standard version</b> | 107 | 735 | 752                     | 4.5 |
| <b>Scenario 1</b>       | 128 | 777 | 729                     | 5.8 |
| <b>Scenario 2</b>       | 98  | 712 | 762                     | 4.2 |
| <b>Scenario 3</b>       | 107 | 736 | 752                     | 4.6 |

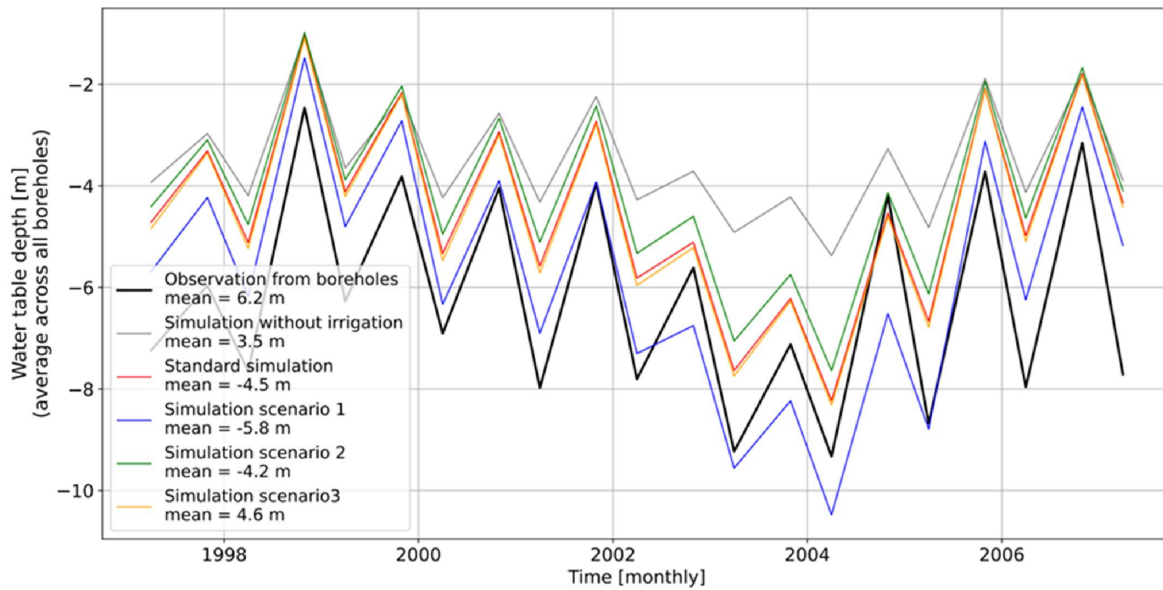

**Figure S2: Comparison between observed and water table depth simulated with different scenarios in Bhima. Black lines represent observed data. Water table depth fluctuations are aggregated from 351 boreholes.**

45

While the model with more irrigation (scenario 1) improves mean water table depth (blue line in Figure S2), the criteria for water table fluctuations is slightly degraded ( $nRMSE = 51\%$  compared to  $40\%$  with the standard version). The impact of the spatial density of the pumping well on water table depth and water table fluctuations is very low. Scenarios 2 and 3 do not show a significant impact on mean water table depth or evapotranspiration rate in groundwater-supported areas (Table S2).

50

Due to lower water tables in scenario 1, the evapotranspiration rate in groundwater-supported areas is more impacted and falls from  $752$  to  $729$  mm/yr/m<sup>2</sup>.
